# Supplementary material for: Novel feathery P/S Co-doped graphitic carbon nitride for highly efficient synergistic photocatalytic H 2 O 2 generation and tetracycline degradation
Source: Royal Society of Chemistry journal article supplement (doi:10.1039/d4ra05879h), 2024-01-01
Supplement: d4ra05879h1.pdf [file d4ra05879h1.pdf]

## Supporting information Novel Feathery P/S co-doped Graphitic Carbon Nitride for Highly Efficient Synergistic Photocatalytic H<sub>2</sub>O<sub>2</sub>-generation and Tetracycline-degradation

### S1 Experimental Section

#### Preparation of g-C<sub>3</sub>N<sub>4</sub> by the hydrothermal method (CN) :

The molar ratio of 1:1 melamine (MA) and cyanuric acid (CA) were dissolved in 50 mL of deionized water, respectively. The solution was stirred in a water bath at 80 °C until it became colorless. Subsequently, the melamine and melinic acid solutions were mixed together and stirred for 40 min. After cooling, the mixture was centrifuged at high speed to obtain melamine solution and melinic acid complexes (MA-CA). The MA-CA complexes was then redispersed into 70 mL of deionized water and stirred for 30 min. The resulting mixed solution was transferred to a 100 mL PTFE stainless steel autoclave for reaction at 150 °C for 10 h. Following this, the white compound was centrifuged and washed several times with ethanol and deionized water, dried under vacuum at 60 °C for 24 h to obtain the MCA precursor after grinding. Finally, the MCA precursor was placed in a porcelain boat with lid in a tube furnace with nitrogen atmosphere and calcined at 520 °C for 2 h before naturally cooled to room temperature to yield the CN photocatalyst.

#### Preparation of g-C<sub>3</sub>N<sub>4</sub> by the calcination method :

Melamine was placed in a covered porcelain boat in a tubular furnace, the atmosphere was nitrogen, calcined at 520°C for 2 h, and naturally cooled to room temperature to obtain a bulk g-C<sub>3</sub>N<sub>4</sub> photocatalyst.

#### Synthesis of P-doped CN (P<sub>x</sub>-CN):

MA-CA was redispersed into 70 mL of deionized water, and various amounts of ammonium dihydrogen phosphate (PA) were added while stirring for 30 min. The mixed solution was then transferred to an autoclave and reacted at 150 °C for 10 h. Subsequently, the P<sub>x</sub>-MCA precursors were obtained through centrifugation, washing, drying, and grinding process. The masses of ammonium dihydrogen phosphate used were 0.1 g, 0.3 g, 0.5 g, and 0.8 g, respectively, corresponding to the labels P<sub>0.1</sub>-MCA, P<sub>0.3</sub>-MCA, P<sub>0.5</sub>-MCA, and P<sub>0.8</sub>-MCA, respectively. The P<sub>x</sub>-MCA precursors were placed in a covered porcelain boat in a tube furnace with a nitrogen atmosphere and calcined at 520 °C for 2 h before being naturally cooled to room temperature to obtain Different P<sub>x</sub>-CN photocatalysts were obtained.

#### Synthesis of S-doped CN (S<sub>y</sub>-CN):

MA-CA was redispersed into 70 mL of deionized water, and different masses of thiourea (TU) was added during stirring for 30 min. The mixed solution was transferred to an autoclave for reaction at 150 °C for 10 h. Subsequently, The S<sub>y</sub>-MCA precursors were obtained by centrifugation, washing, drying, and grinding. Thiourea masses of 0.1 g, 0.2 g, 0.4 g, and 0.6 g were used and labeled as S<sub>0.1</sub>-MCA, S<sub>0.2</sub>-MCA, S<sub>0.4</sub>-MCA, and S<sub>0.6</sub>-MCA. The S<sub>x</sub>-MCA precursors were placed in a covered porcelain boat in a tube furnace with nitrogen atmosphere and calcined at 520 °C for 2 h. Finally, the precursors were naturally cooled to room temperature to obtain different S<sub>y</sub>-CN photocatalysts.

#### Synthesis of P and S co-doped CN (P<sub>x</sub>S<sub>y</sub>-CN):

MA-CA was redispersed into 70 mL of deionized water, and varying amounts of ammonium dihydrogen phosphate and thiourea were added while stirring for 30 min. The mixed solution was transferred to an autoclave for reaction at 150 °C for 10 h. Subsequently, P<sub>x</sub>S<sub>y</sub>-MCA precursor was obtained by centrifugation, washing, drying, and grinding. Ammonium dihydrogen phosphate weighing 0.3 g and thiourea mass of 0.2 g were labeled as P<sub>0.3</sub>S<sub>0.2</sub>-CN. The different P<sub>x</sub>S<sub>y</sub>-CN precursors

were obtained by placing the P<sub>x</sub>S<sub>y</sub>-CMA precursors in a covered porcelain boat in a tube furnace with nitrogen atmosphere and calcined at 520 °C for 2 h and naturally cooled to room temperature.

## S2 Evaluation of H<sub>2</sub>O<sub>2</sub> photocatalytic production

The photocatalyst was dissolved in 50 mL of aqueous solution (containing 10% isopropanol), followed by sonication for 3 min and stirring for 30 min under light-proof conditions. Continuous feeding of O<sub>2</sub> was carried out to reach the adsorption-desorption equilibrium. The distance between the light source and the reactor was kept at a fixed value throughout the experiment, while the temperature was kept at 25 °C. Prior to the photocatalytic reaction, the Xe lamp was generally preheated for 30 min, and a small amount of O<sub>2</sub> was introduced into the solution during the entire reaction process. Taking the mixed solution at 30 min intervals, filtered through a 0.22 μm membrane, and the supernatant was centrifuged (8000 rpm·min<sup>-1</sup>, 10 min) to measure the concentration of H<sub>2</sub>O<sub>2</sub> by iodometric measurement. The standard curve of H<sub>2</sub>O<sub>2</sub> was obtained by UV-Vis spectrophotometer at a wavelength of 350 nm after equilibrated. The concentrations of H<sub>2</sub>O<sub>2</sub> produced by different carbon nitrides were obtained from the standard curve.

The H<sub>2</sub>O<sub>2</sub> was decomposed as follows: the Xe lamp was preheated, the photocatalyst was put into H<sub>2</sub>O<sub>2</sub> of known concentration (a) without adding hydrogen source (isopropanol), and the supernatant was obtained by filtration and centrifugation of the mixed solution at 30 min intervals. A blank group was set up and H<sub>2</sub>O<sub>2</sub> was substituted for H<sub>2</sub>O, and the above steps were repeated to measure the concentration (c). The final decomposition efficiency η(H<sub>2</sub>O<sub>2</sub>) is shown in Equation 1.1.

$$\eta(\text{H}_2\text{O}_2) = \frac{a - b + c}{a} \times 100\% \quad (\text{S1.1})$$

Stability test of photocatalytic H<sub>2</sub>O<sub>2</sub> production: H<sub>2</sub>O<sub>2</sub> in a 50 mL solution (containing 10% isopropanol) using 50 mg of photocatalyst was performed for repeatedly replicate experiments.

## S3 Evaluation of Photocatalytic oxidation-Fenton oxidation for TC degradation

The photocatalyst was dispersed into 50 mL of TC solution (10 ~ 80 mg·L<sup>-1</sup>) and stirred in the dark for 30 min to reach adsorption-desorption equilibrium with the antibiotic TC. The LED lamp disc (λ = 420 nm) generally needs to be preheated for 5 min before the photocatalytic reaction. The whole experiment was controlled at 25 °C, and a small amount of oxygen was introduced into the reaction flask. After illuminating for 60 min, 1.6 mg FeSO<sub>4</sub>·7H<sub>2</sub>O was added to the solution, and the reaction was stopped until 100 min. The stirring speed was set at 100 rpm·min<sup>-1</sup>. During the degradation of TC, the mixed solution was taken every 20 min, filtered through a 0.22 μm membrane, and the supernatant was taken by centrifugation (8000 rpm·min<sup>-1</sup>, 10 min). The absorbance of TC was measured using UV-Vis spectrophotometer and the degradation efficiency was calculated. The photodegradation efficiency (η<sub>eff</sub>) of TC solution was determined according to Equation 1.2:

$$\eta_{\text{eff}} = \left(1 - \frac{C_t}{C_0}\right) \times 100\% = \left(1 - \frac{A_t}{A_0}\right) \times 100\% \quad (\text{S1.2})$$

The above experiments were repeated for the carbon nitride selected for the best photocatalytic performance, and the solutions were taken for each fixed time period and detected by High Performance Liquid Chromatography-Quadrupole-Time of Flight-Mass Spectrometry (HPLC-Q-TOF-MS). HPLC-Q-TOF-MS) and quenched with methanol prior to detection. Photocatalytic degradation intermediates can be detected by HPLC-Q-TOF/ESI-MS/MS in selective reaction monitoring

mode.

### Kinetic analysis of photocatalytic degradation

Assessing the photocatalytic performance of carbon nitride can be made more intuitive by analyzing the kinetics. In general, the Langmuir-Hinshelwood kinetic model is used to represent the reaction of organic pollutants on the photocatalyst. The rate of photocatalytic antibiotic degradation is shown in Equation S1.3:

$$r = k_r = -\frac{dc}{dt} = k_r \frac{K_a C}{1 + K_a} \times 100\% \quad (S1.3)$$

where  $r$  is the photocatalytic degradation rate,  $k_r$  reflects the true rate constant, and  $K_a$  is the adsorption constant. At low initial concentrations ( $K_a C \ll 1$ ), the  $K_a C$  in Eq. is generally negligible, in accordance with the following pseudo primary kinetic model (Eqs. S1.4 and S1.5):

$$r = -\frac{dc}{dt} = k_r k_a t \times 100\% = k_{pfo} t \quad (S1.4)$$

This kinetic model can be simplified as follows:

$$\ln = k_r k_a t \times 100\% = k_{pfo} t \quad (S1.5)$$

$C_0$  and  $C_t$  and are the initial concentration and concentration of TC ( $\text{mg} \cdot \text{L}^{-1}$ ),  $k_{pfo}$  is the quasi-primary reaction rate constant for photodegradation of TC ( $\text{min}^{-1}$ ), and  $t$  is the reaction time for photodegradation ( $\text{min}$ )<sup>1, 2</sup>.

### S4 Characterization

In the experimental process, the microscopic morphology of the synthesized materials was primarily observed and recorded using a field emission scanning electron microscope (SEM, ULTRA plus), a transmission electron microscope (TEM, TECNAI-G2-TF20), and a high-resolution transmission electron microscope (HRTEM). The crystal lattice details were captured with the high-resolution transmission electron microscope (High-resolution TEM). Additionally, the atomic structure and elemental composition of the materials were precisely analyzed using an energy dispersive X-ray spectroscope (EDS, Oxford X-max 20). The qualitative analysis of the crystal structure of the synthesized materials was mainly performed using X-ray powder diffraction (XRD, Bruker AXS D8 Advance, Cu-K $\alpha$ ,  $\lambda = 1.5406 \text{ \AA}$ ,  $2\theta$  range of  $10^\circ$  to  $70^\circ$ , scan rate:  $2^\circ \text{C} \cdot \text{min}^{-1}$ ).

The elemental composition, atomic valence states, chemical bonds, and contents of the synthesized materials were analyzed using X-ray photoelectron spectroscopy (XPS, ESCALab250iX, with a monochromator resolution of  $\leq 0.45 \text{ eV}$ ). The surface functional groups and chemical bonds of the synthesized materials were qualitatively analyzed using Fourier-transform infrared spectroscopy (FT-IR, 200VCE, with a wavenumber range of  $500$  to  $4000 \text{ cm}^{-1}$ , resolution of  $4 \text{ cm}^{-1}$ , and a single scan exposure time of  $30 \text{ s}$ ). The specific surface area of all synthesized samples was measured using the Brunauer-Emmett-Teller (BET) equation at a temperature of  $373 \text{ K}$  ( $\text{N}_2$  environment, Quadrasorb SI, Quantachrome, USA).

The optical properties of the materials were analyzed and measured using a solid UV-Vis diffuse reflectance spectroscopy (UV-vis-DRS) spectrophotometer (Shimadzu UV-3600, Japan). Residual organic molecules from antibiotic steps were quantitatively analyzed using a UV spectrophotometer (UV-3900, Shimadzu, Japan). Additionally, optical

properties (excitation wavelength  $\lambda = 360$  nm) were tested and analyzed using photoluminescence (PL, RF-6000, Shimadzu, Japan) spectroscopy and time-resolved photoluminescence (TRPL, FLS980, Edinburgh Instruments, UK). The electronic spin resonance signals of radicals were measured using an electron spin resonance spectrometer (EPR, Bruker E500, visible light wavelength  $\lambda > 420$  nm, spin trapping reagent: 5-dimethyl-L-pyrroline-N-oxide (DMPO)).

### S5 Photocurrent and EIS measurements

Photocurrent and EIS measurements were conducted using an electrochemical workstation (CHI-760, China). A standard three-electrode setup was used, with a Pt electrode as the working electrode and a saturated calomel electrode (SCE) as the reference electrode. The working electrode preparation steps are as follows: 5 mg of the sample was dispersed in 950  $\mu\text{L}$  of anhydrous ethanol and 100  $\mu\text{L}$  of Nafion solution to form a slurry, which was then dropped onto a 0.25  $\text{cm}^2$  FTO substrate and vacuum-dried at 60°C for 24 hours. The electrolyte for photocurrent measurements was a 0.1 M  $\text{Na}_2\text{SO}_4$  solution, and the light source was a 300 W Xe lamp ( $\lambda > 420$  nm). Electrochemical impedance spectroscopy (EIS) was performed over a frequency range of  $1.0 \times 10^5$  to 0.01 Hz, with a sine wave perturbation amplitude of 5.0 mV at a potential bias of 0.2 eV vs. SCE. The electrolyte for impedance testing was a mixed solution of 1 mM  $\text{K}_3\text{Fe}(\text{CN})_6$ , 1 mM  $\text{K}_4\text{Fe}(\text{CN})_6 \cdot 3\text{H}_2\text{O}$ , and 0.1 M KCl.

### S6 DFT calculation methods

In this study, generalized gradient approximation (GGA) was used to calculate all spin polarization density functional theory (DFT) using the first-principles Perdew-Burke-Ernzerhof (PBE) formulation. The plane wave pseudopotential (PAW) was chosen to describe the interaction between the nucleus and the electron, and the truncated energy of the plane wave group is 450 eV. In the geometric optimization, the convergence criteria for the energy and force of the self-consistent field are set to  $1 \times 10^{-5}$  eV and 0.02 eV/Å, respectively, and the K point of the gamma grid selected in the reciprocal space Brillouin region is  $2 \times 2 \times 1$ .

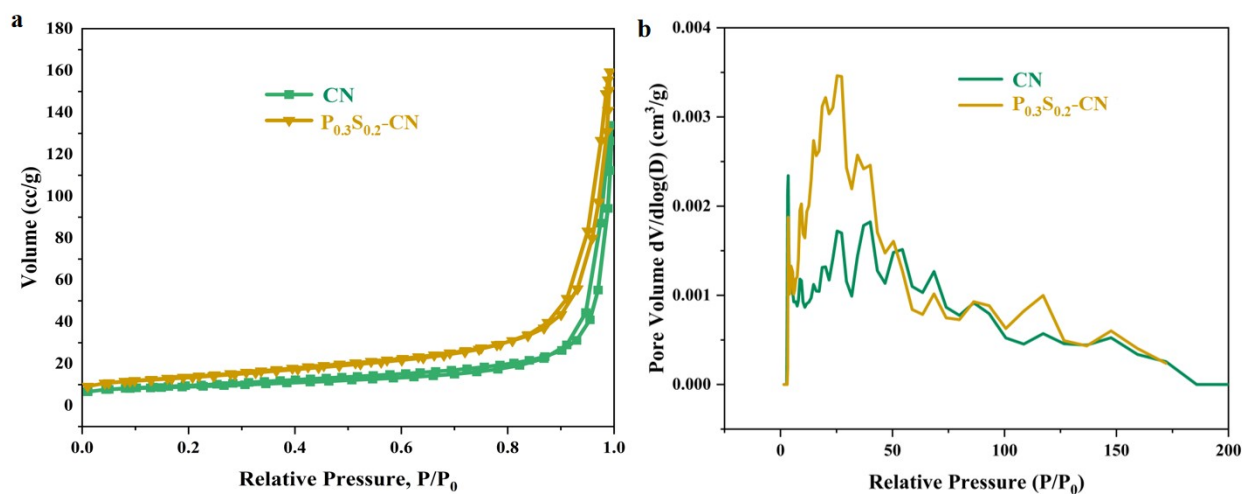

Figure S1. CN and PS-CN of (a)  $\text{N}_2$  adsorption and desorption isotherms and, (d) BJH pore size distribution. In the range of relative pressure 0 to 1.0, both CN and  $\text{P}_{0.3}\text{S}_{0.2}\text{-CN}$  catalysts exhibit type IV adsorption isotherms according to the IUPAC

classification, with the hysteresis loop occurring around 1.0. This indicates the presence of mesoporous structures in the samples. A significant change in adsorption capacity when  $P/P_0$  increases to 0.85 to 1.0 suggests the presence of capillary condensation. As shown in Figure S1a, the pore size distribution of the samples was obtained using Barrett-Joyner-Halenda (BJH) analysis. The specific surface areas of CN and  $P_{0.3}S_{0.2}$ -CN are 33.45 and 48.23  $\text{m}^2\cdot\text{g}^{-1}$ , respectively, with corresponding pore sizes of 24.74 and 20.43 nm. The specific surface area of  $P_{0.3}S_{0.2}$ -CN is 5.84 times greater than that of the  $g\text{-C}_3\text{N}_4$  prepared in the literature ( $8.25 \text{ m}^2\cdot\text{g}^{-1}$ )<sup>3</sup>.

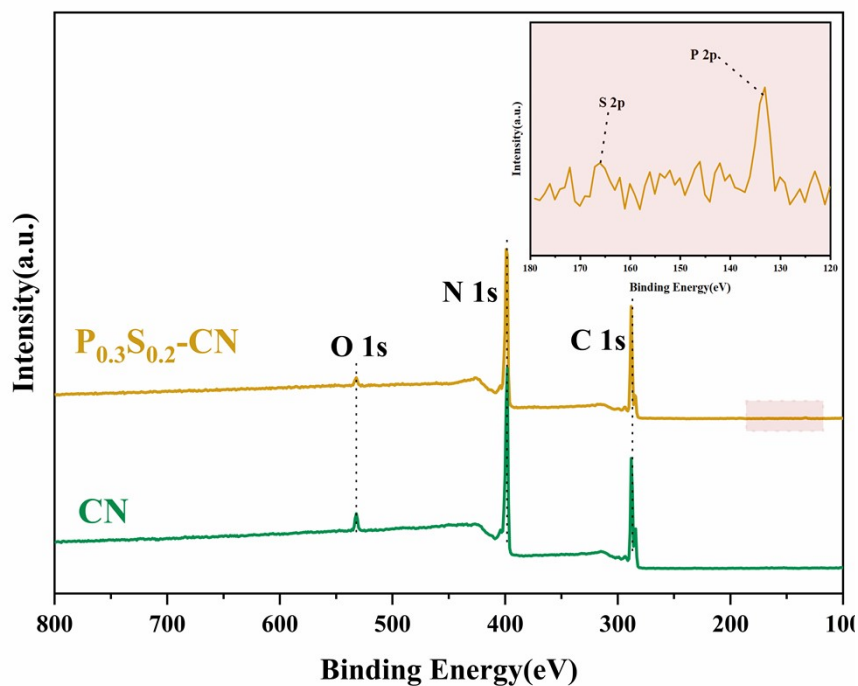

Figure S2. XPS scanning spectra of CN and  $P_{0.3}S_{0.2}$ -CN.

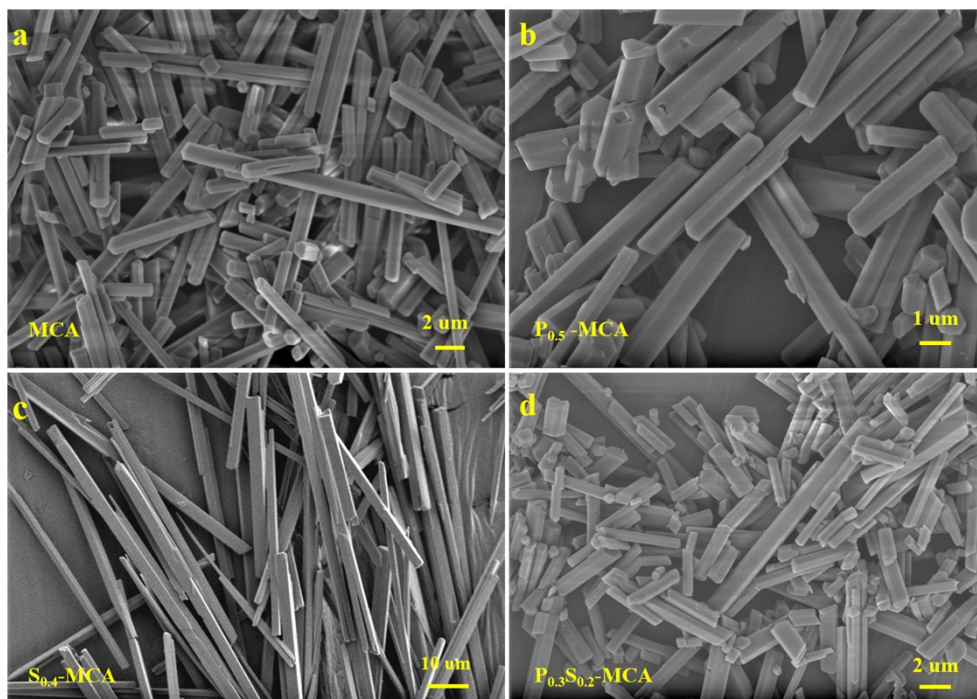

Figure S3. SEM images of (a) MCA, (b) P<sub>0.5</sub>-MCA, (c) S<sub>0.4</sub>-MCA and (d)P<sub>0.3</sub>S<sub>0.2</sub>-MCA.

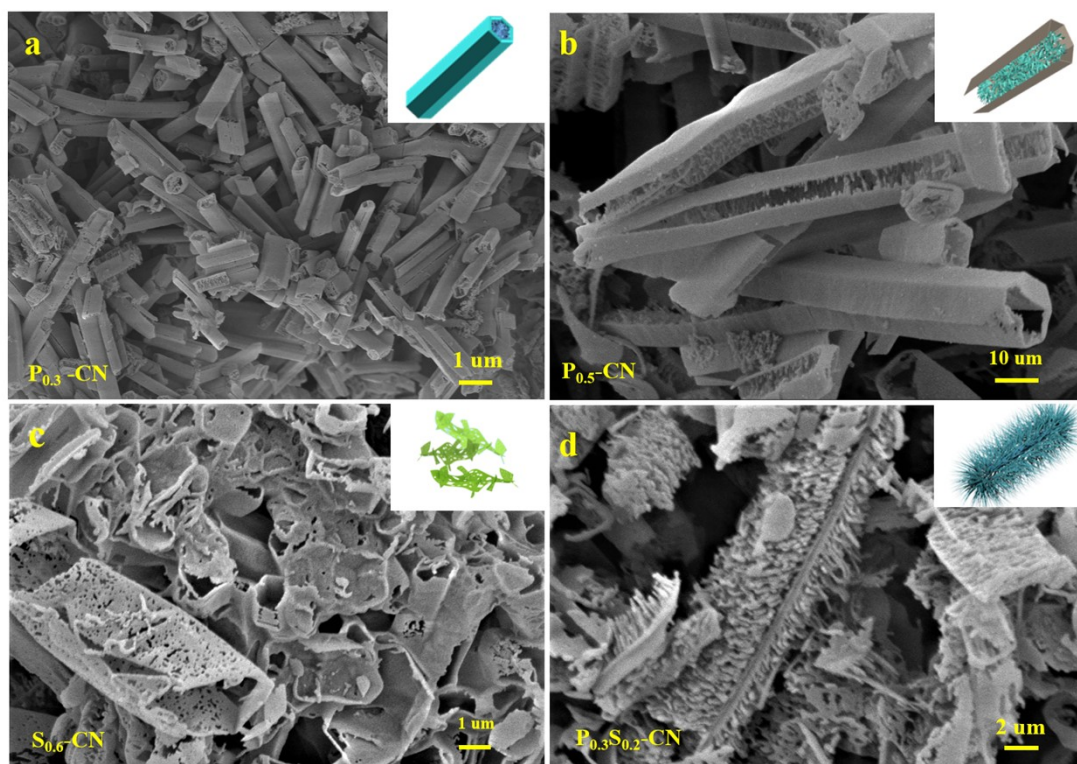

Figure S4. SEM images of (a)P<sub>0.5</sub>-CN, (b)P<sub>0.3</sub>-CN, (c)S<sub>0.6</sub>-CN with (d)P<sub>0.3</sub>S<sub>0.2</sub>-CN.

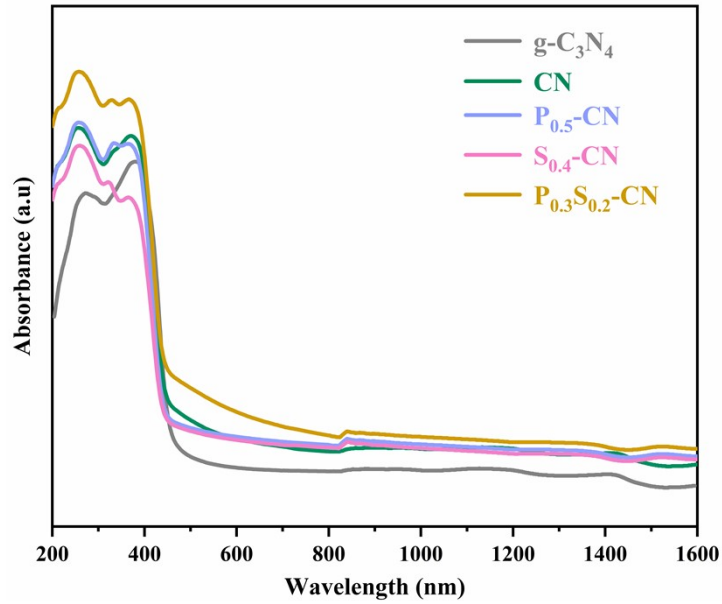

Figure S5. UV-Vis DRS plots of  $g\text{-C}_3\text{N}_4$ , CN,  $\text{P}_{0.5}\text{-CN}$ ,  $\text{S}_{0.4}\text{-CN}$ , and  $\text{P}_{0.3}\text{S}_{0.2}\text{-CN}$ .

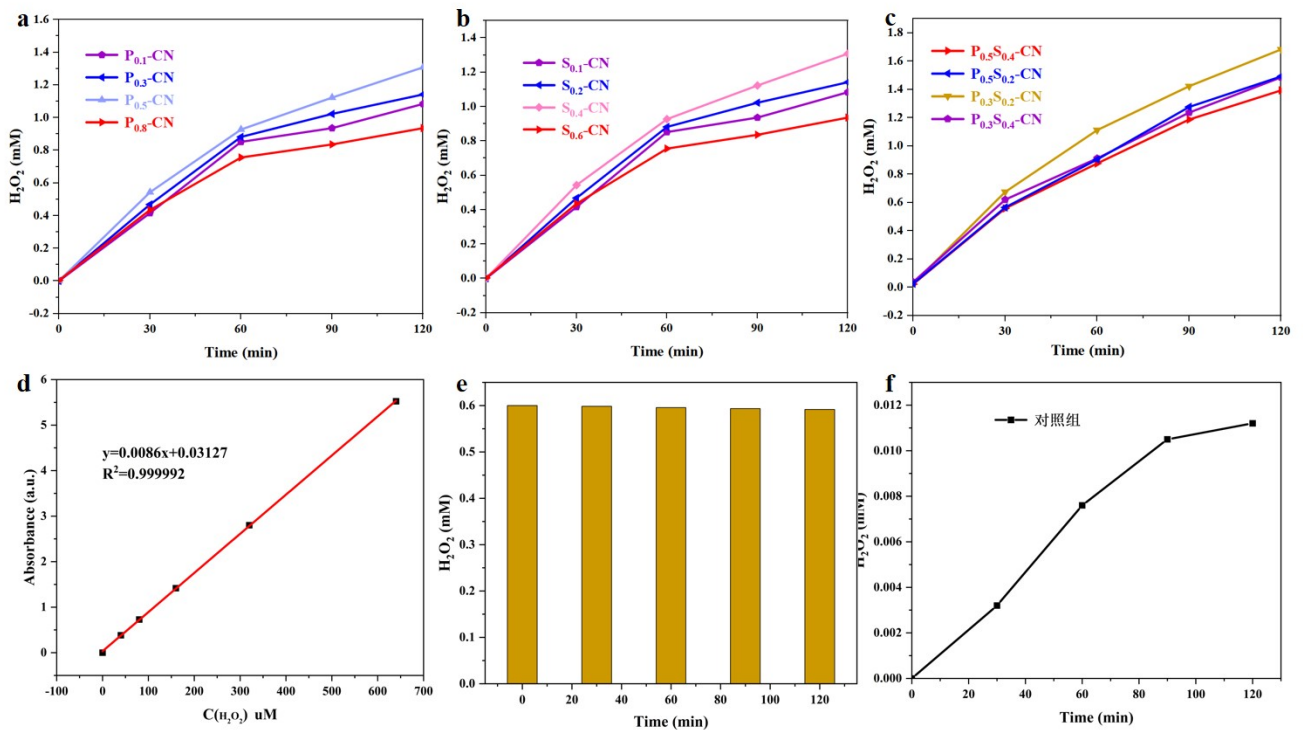

Figure S6. Photocatalytic  $\text{H}_2\text{O}_2$  yields of (a) different amounts of P-doped CN, (b) different amounts of S-doped CN, (c) different amounts of P and S-doped CN, (d) Standard curve of  $\text{H}_2\text{O}_2$ , (e) Photocatalytic decomposition of  $\text{H}_2\text{O}_2$ , (f) blank control experiment.

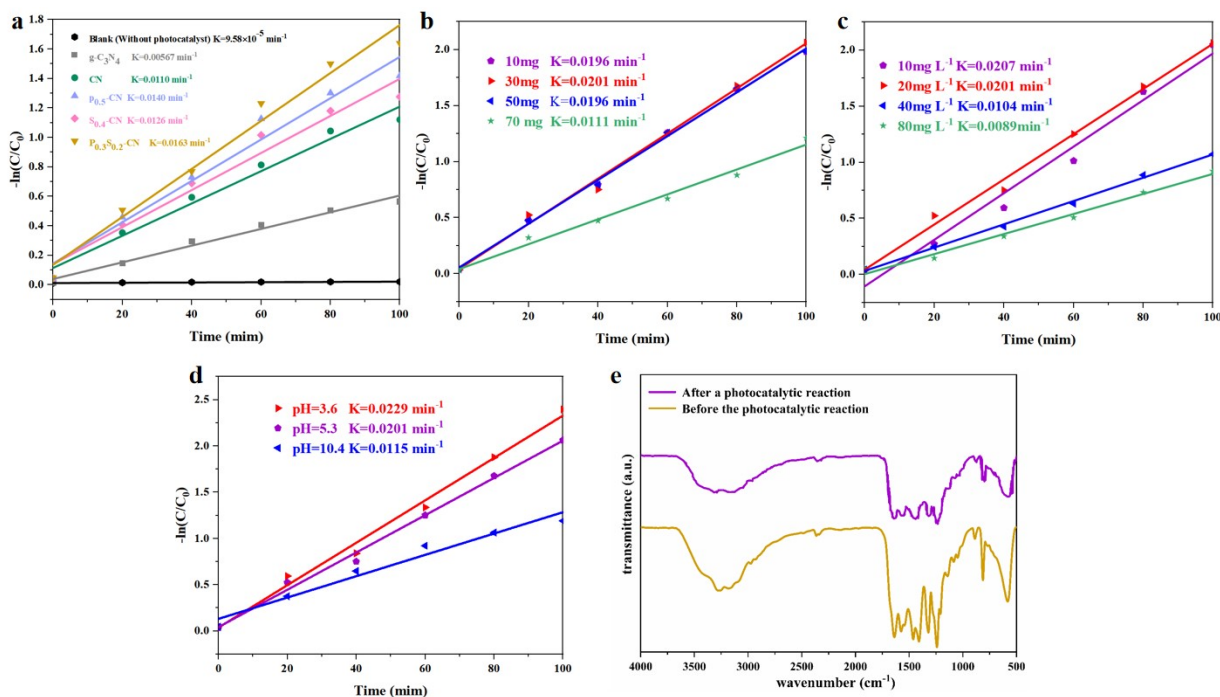

Figure S7. Under visible light irradiation (a) Photocatalytic oxidative degradation of TC (20 mg/L) by different catalysts (30 mg), (b) Effect of the amount of PS-CN, (c) initial concentration of TC, (d) different pH on photocatalytic oxidation-Fenton oxidative degradation corresponding kinetic curves, (e) the Fourier-transform infrared spectrum of  $P_{0.3}S_{0.2}$  after four cycles of photocatalytic experiments.

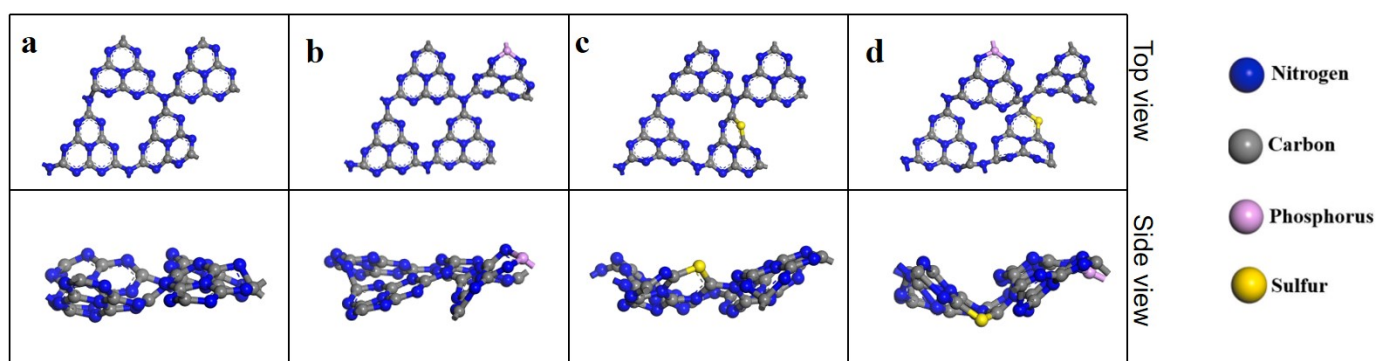

Figure S8. The top and side views of the geometric structure of the (a) pristine CN, (b) P-CN, (c) S-CN, (d)  $P_{0.3}S_{0.2}$ -CN. while the gray, blue, pink, and yellow balls represent the C, N, P, and S atoms.

According to the XPS results, for the P atoms, the P-N bond in the samples indicate that they were doped into the CN lattice by replacing the C atoms. While for the S atoms, the existence of S-C bonds indicates the S atoms were doped by replacing the N atoms. According to the DFT theoretical calculation from previous reports, S atoms preferentially replace N atoms at the edges of  $g-C_3N_4$ , while P atoms preferentially replace C atoms at the edges of  $g-C_3N_4$ , the C site were recognized as the optimal P doping site for its lowest formation energy, and the N site were recognized as the optimal S doping site for its lowest formation energy<sup>4, 5</sup>.



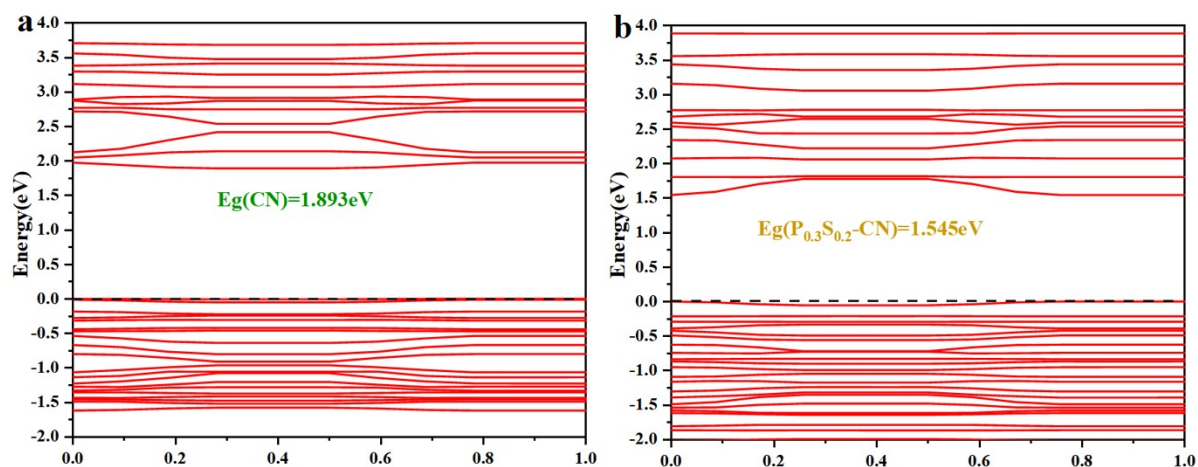

Figure S9. The Band structure plots of the (a) CN and (b)  $P_{0.3}S_{0.2}$ -CN.

Table S1. Comparison of  $H_2O_2$  production by various photocatalysts

| Photocatalysts                        | Dosage<br>( $g L^{-1}$ ) | Reaction<br>solution | Light source                                              | $H_2O_2$                             | Reference |
|---------------------------------------|--------------------------|----------------------|-----------------------------------------------------------|--------------------------------------|-----------|
|                                       |                          |                      |                                                           | production<br>( $mg L^{-1} h^{-1}$ ) |           |
| B-CNT                                 | 1                        | 10 vol% IPA          | 300 W XL                                                  | 31.1                                 | 5         |
| $Bi_2S_3@CdS@RGO$                     | 1                        | 10 vol% IPA          | 300 W XL<br>( $420\text{ nm} < \lambda < 800\text{ nm}$ ) | 2.4                                  | 6         |
| SS-CN                                 | 0.5                      | 10 vol% IPA          | 300 W XL<br>( $\lambda > 420\text{ nm}$ )                 | 2.4                                  | 7         |
| KTTCN                                 | 1                        | 0.5 vol% IPA         | 300 W XL<br>( $\lambda > 420\text{ nm}$ )                 | 19.2                                 | 8         |
| $Ti_3C_2$ Mxene/porous<br>g- $C_3N_4$ | 1                        | 10 vol% IPA          | 300 W XL<br>( $\lambda > 420\text{ nm}$ )                 | 4.47                                 | 9         |
| DCN                                   | 0.83                     | 20 vol% IPA          | AM1.5 visible light<br>( $\lambda > 420\text{ nm}$ )      | 0.16                                 | 10        |
| $ZnIn_2S_4/FTCNso$                    | 0.5                      | 10 vol% IPA          | 300 W XL<br>( $\lambda > 420\text{ nm}$ )                 | 4.6                                  | 11        |
| IO CN-Cv                              | 1                        | 10 vol% IPA          | 300 W XL<br>( $\lambda > 420\text{ nm}$ )                 | 5.5                                  | 12        |

|                            |   |             |                                            |      |           |
|----------------------------|---|-------------|--------------------------------------------|------|-----------|
| $P_{0.3}S_{0.2}\text{-CN}$ | 1 | 10 vol% IPA | 300 W XL<br>( $\lambda > 420 \text{ nm}$ ) | 28.6 | This work |
|----------------------------|---|-------------|--------------------------------------------|------|-----------|

Table S2. Analysis of degradation products of TC by  $P_{0.3}S_{0.2}\text{-CN}$  photocatalyst under visible light irradiation

| Products       | Fragment          | Molecular            | Supposed Structure                                                                   |
|----------------|-------------------|----------------------|--------------------------------------------------------------------------------------|
|                | Information (m/z) | Formula              |                                                                                      |
| P <sub>1</sub> | 430               | $C_{21}H_{22}N_2O_8$ | 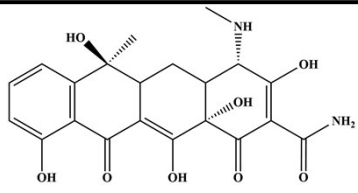   |
| P <sub>2</sub> | 416               | $C_{20}H_{20}N_2O_8$ |    |
| P <sub>3</sub> | 358               | $C_{19}H_{18}O_7$    |   |
| P <sub>4</sub> | 332               | $C_{16}H_{12}O_8$    |  |
| P <sub>5</sub> | 272               | $C_{15}H_{12}O_5$    |  |
| P <sub>6</sub> | 150               | $C_9H_{10}O_2$       |  |
| P <sub>7</sub> | 428               | $C_{22}H_{24}N_2O_7$ |  |

|                 |     |                                                               |                                                                                       |
|-----------------|-----|---------------------------------------------------------------|---------------------------------------------------------------------------------------|
| P <sub>8</sub>  | 411 | C <sub>22</sub> H <sub>21</sub> NO <sub>7</sub>               | 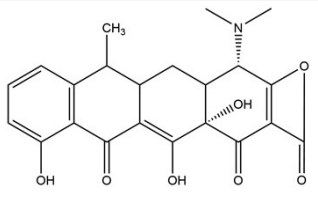    |
| P <sub>9</sub>  | 319 | C <sub>18</sub> H <sub>25</sub> NO <sub>4</sub>               |     |
| P <sub>10</sub> | 275 | C <sub>16</sub> H <sub>21</sub> NO <sub>3</sub>               |     |
| P <sub>11</sub> | 136 | C <sub>8</sub> H <sub>8</sub> O <sub>2</sub>                  |    |
| P <sub>12</sub> | 446 | C <sub>22</sub> H <sub>26</sub> N <sub>2</sub> O <sub>8</sub> |    |
| P <sub>13</sub> | 418 | C <sub>20</sub> H <sub>22</sub> N <sub>2</sub> O <sub>8</sub> |   |
| P <sub>14</sub> | 357 | C <sub>19</sub> H <sub>19</sub> NO <sub>6</sub>               |  |
| P <sub>15</sub> | 331 | C <sub>18</sub> H <sub>21</sub> NO <sub>5</sub>               |  |
| P <sub>16</sub> | 234 | C <sub>14</sub> H <sub>18</sub> O <sub>3</sub>                |  |

P<sub>17</sub>

150

C<sub>9</sub>H<sub>10</sub>O<sub>2</sub>

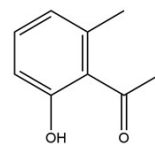

# References

- 1 D.C. Pham, T. Cao, M.C. Nguyen, T.D. Nguyen, V.H. Nguyen, V.H. Bui and T. Nguyen, *Chem. Eng. Technol.*, 2022, **45**, 1748-1758.
- 2 J. Hou, D. Gao, X. Hu, L. Wang and Q. Guo, *J. Mol. Struct.*, 2023, **1275**.
- 3 X. Li, J. Zhang, Y. Huo, K. Dai, S. Li and S. Chen, *Appl. Catal. B-Environ.*, 2021, **280**.
- 4 Z. Wang, M. Chen, Y. Huang, X. Shi, Y. Zhang, T. Huang, J. Cao, W. Ho and S.C. Lee, *Appl. Catal. B-Environ.*, 2018, **239**, 352-361.
- 5 Y. Liu, Y. Zheng, W. Zhang, Z. Peng, H. Xie, Y. Wang, X. Guo, M. Zhang, R. Li and Y. Huang, *J. Mater. Sci. Technol.*, 2021, **95**, 127-135.
- 6 S.M. Ghoreishian, K.S. Ranjith, B. Park, S. Hwang, R. Hosseini, R. Behjatmanesh-Ardakani, S.M. Pourmortazavi, H.U. Lee, B. Son, S. Mirsadeghi, Y. Han and Y.S. Huh, *Chem. Eng. J.*, 2021, **419**.
- 7 C. Feng, L. Tang, Y. Deng, J. Wang, Y. Liu, X. Ouyang, H. Yang, J. Yu and J. Wang, *Appl. Catal. B-Environ.*, 2021, **281**.
- 8 J. Zhang, C. Yu, J. Lang, Y. Zhou, B. Zhou, Y.H. Hu and M. Long, *Appl. Catal. B-Environ.*, 2020, **277**.
- 9 Y. Yang, Z. Zeng, G. Zeng, D. Huang, R. Xiao, C. Zhang, C. Zhou, W. Xiong, W. Wang, M. Cheng, W. Xue, H. Guo, X. Tang and D. He, *Appl. Catal. B-Environ.*, 2019, **258**.
- 10 L. Shi, L. Yang, W. Zhou, Y. Liu, L. Yin, X. Hai, H. Song and J. Ye, *Small*, 2018, **14**.
- 11 Q. Liang, X. Liu, B. Shao, L. Tang, Z. Liu, W. Zhang, S. Gong, Y. Liu, Q. He, T. Wu, Y. Pan and S. Tong, *Chem. Eng. J.*, 2021, **426**.
- 12 J. Lei, B. Chen, W. Lv, L. Zhou, L. Wang, Y. Liu and J. Zhang, *Acs Sustain. Chem. Eng.*, 2019, **7**, 16467-16473.
